# Supplementary material for: Transcriptome analysis of an incompatible Persea americana-Phytophthora cinnamomi interaction reveals the involvement of SA- and JA-pathways in a successful defense response
Source: PubMed Central journal article supplement (PMC6192619; doi:10.1371/journal.pone.0205705), 2018-10-17
Supplement: pone.0205705.s002.pdf [file pone.0205705.s002.pdf]

**S1 Table. Primer sequences for RT-qPCR validation of avocado microarray data.**

| Gene                                 | Seq ID | Forward primer (5'-3')   | Reverse primer (5'-3')  | Product size (bp) | Annealing temperature | Efficiency % |
|--------------------------------------|--------|--------------------------|-------------------------|-------------------|-----------------------|--------------|
| <i>LOX</i>                           | 00275  | TGTCGGACCTGATCCAAACTTGC  | CCCAAAGTTGACTGCATGG     | 74                | 62.5 °C               | 99           |
| <i>PR4</i>                           | 06278  | GACAGGAGCTCAGACAACAGTGAG | AGCCACCCTCATCCAAATCCAG  | 74                | 58 °C                 | 92           |
| <i>PR1</i>                           | 01593  | GCGGCTGGAAAGGTTTGT       | GGGGCTGTAGTTGCAAGT      | 102               | 58 °C                 | 97.6         |
| <i>JAZ3</i>                          | 03967  | GCGATGGTGAAAGAGGAGAC     | TGAAATGAGGAAGAGTTGAGACC | 108               | 59.5 °C               | 95           |
| <i><math>\alpha 1</math> tubulin</i> | 02778  | GGATGTAGTCTTCTCTGTTCCC   | CAGTATGCCATTACCATGAATGC | 122               | 58 °C                 | 91.8         |

Primers were designed for *lipoxygenase 1 (LOX)*, *pathogenesis-related group-4 (PR-4)*, *pathogenesis-related group-1 (PR-1)*, *jasmonate ZIM-domain (JAZ3)* genes.  *$\alpha 1$  tubulin* was used as a reference gene. All genes had amplification efficiencies above 90% and amplified between 58 and 62.5°C.
